# Supplementary material
Source: PubMed Central journal article supplement (PMC7529849)
Supplement: NIHMS1601273-supplement-1.pdf [file NIHMS1601273-supplement-1.pdf]

**Supplementary Information 1 | Association RNA-binding protein with viral infection.** The 17 proteins annotated as members of the Reactome "RALY/hnRNP-C" module in Figure 2g were analyzed for published association with viral infection. Table includes manual interpretation of function and association with virus or infection, with PMID indicated.

| Gene   | Uniprot ID | Protein Name                                                             | Synonyms/Alternate names                              | Function                                                                                                                                     | Association with virus or infection (PMID in parentheses)                                                                                                                                                                                                                                                                                                                                                                                                        |
|--------|------------|--------------------------------------------------------------------------|-------------------------------------------------------|----------------------------------------------------------------------------------------------------------------------------------------------|------------------------------------------------------------------------------------------------------------------------------------------------------------------------------------------------------------------------------------------------------------------------------------------------------------------------------------------------------------------------------------------------------------------------------------------------------------------|
| RPN2   | P04844     | Dolichyl-diphosphooligosaccharide--protein glycosyltransferase subunit 2 | RPN-II, RIBIIR, Ribophorin-2                          | N-glycosylation                                                                                                                              | none                                                                                                                                                                                                                                                                                                                                                                                                                                                             |
| RPSA   | P08865     | 40S ribosomal protein SA                                                 | LAMBR, LAMR1                                          | assembly and stability of 40S ribosomal subunit                                                                                              | acts as a receptor for AAV (16973587), Dengue (15507651), Sindbis (1385835), Venezuelan equine encephalitis virus (1385835), swine fever virus (25694590), interacts with Foot-and-mouth disease virus protein VP1 (31694957), interacts with Hepatitis C virus cis-acting replication element (30382192)                                                                                                                                                        |
| PABPN1 | Q86U42     | Polyadenylate-binding protein 2                                          | PABP-2, Poly(A)-binding protein 2, PABII, PAB2, PABP2 | poly(A) tail assembly and other stages of mRNA metabolism                                                                                    | involved in viral RNA decay of KHSV (30785952), binding or localization may be impacted by canine parvovirus (23035221), Arabidopsis thaliana protein interacts with Turnip mosaic virus (17670821), Influenza A NS1 proteins binds and relocalizes (10205180)                                                                                                                                                                                                   |
| HNRNPU | Q00839     | Heterogeneous nuclear ribonucleoprotein U                                | SAFA, HNRPU                                           | DNA and RNA binding, involved in chromatin organization, transcription, RNA splicing, RNA stability, Xist-mediated transcriptional silencing | potential viral RNA sensor of HSV (31513772), negative regulator of HIV transcript expression (16916646)                                                                                                                                                                                                                                                                                                                                                         |
| ABCD3  | P28288     | ATP-binding cassette sub-family D member 3                               | PMP70, PXMP1                                          | long chain fatty acid transporter, ATPase activity                                                                                           | involved in latent KSHV infection (28257516)                                                                                                                                                                                                                                                                                                                                                                                                                     |
| EIF4A3 | P38919     | Eukaryotic initiation factor 4A-III                                      | DDX48, KIAA0111, eIF4A-III                            | RNA helicase, component of spliceosome                                                                                                       | mediates viral RNA processing in Avian Influenza A virus (31379779)                                                                                                                                                                                                                                                                                                                                                                                              |
| RALY   | Q9UKM9     | RNA-binding protein Raly                                                 | HNRNPCL2, P542                                        | RNA binding protein, in hnRNP family                                                                                                         | none                                                                                                                                                                                                                                                                                                                                                                                                                                                             |
| SND1   | Q7KZF4     | Staphylococcal nuclease domain-containing protein 1                      | TDRD11                                                | endonuclease, RNA decay                                                                                                                      | m6A reader required for normal KSHV gene expression and lytic replication (31647415), binds Dengue virus 3' UTR and required for normal DENV replication and RNA levels (21148275), interacts with NSP1 of Equine arteritis virus (12917451), binds to Epstein-Barr EBNA2 and coactivates gene expression (7651391)                                                                                                                                              |
| RPL7A  | P62424     | 60S ribosomal protein L7a                                                | SURF3, Large ribosomal subunit protein eL8            | ribosomal protein                                                                                                                            | L. striatellus RPL7a binds to Rice stripe virus particles (22028913)                                                                                                                                                                                                                                                                                                                                                                                             |
| RPS8   | P62241     | 40S ribosomal protein S8                                                 | Small ribosomal subunit protein eS8                   | ribosomal protein                                                                                                                            | interacts with Dengue virus 3' UTR and implicated in DENV replication (26389898)                                                                                                                                                                                                                                                                                                                                                                                 |
| HBS1L  | Q9Y450     | HBS1-like protein                                                        | ERFS, HBS1, KIAA1038                                  | elongation factor, RNA quality control                                                                                                       | assists in degradation of Hepatitis B virus X-mRNA (27281821)                                                                                                                                                                                                                                                                                                                                                                                                    |
| ABCD1  | P33897     | ATP-binding cassette sub-family D member 1                               | ALD, ALDP                                             | ATP binding, nucleotide binding, transport                                                                                                   | none                                                                                                                                                                                                                                                                                                                                                                                                                                                             |
| HNRNPC | P07910     | Heterogeneous nuclear ribonucleoproteins C1/C2                           | HNRNPC                                                | interacts with poly-U tracts of mRNA, modulates RNA stability and splicing                                                                   | binds EBV IR1 sisRNA (29458410), binds the Influenza B virus NS1 protein (28869005), upregulated during Japanese encephalitis virus infection and binds JEV RNA (28102850), involved in Dengue virus RNA synthesis and impacts replication (25890165), interacts with Hepatitis delta virus small antigen (21774814), binds the Human Papillomavirus type-1 AU-rich inhibitory element (11172920), interacts with Epstein-Barr early proteins SM and M (9765385) |
| TPM4   | P67936     | Tropomyosin alpha-4 chain                                                | TM30p1, Tropomyosin-4                                 | actin binding protein                                                                                                                        | none                                                                                                                                                                                                                                                                                                                                                                                                                                                             |
| RPL15  | P61313     | 60S ribosomal protein L15                                                | EC45, Large ribosomal subunit protein eL15            | ribosomal protein                                                                                                                            | binds Classical swine fever virus NS4B protein (30541955)                                                                                                                                                                                                                                                                                                                                                                                                        |
| RPS15A | P62244     | 40S ribosomal protein S15a                                               | Small ribosomal subunit protein uS8                   | ribosomal protein                                                                                                                            | none                                                                                                                                                                                                                                                                                                                                                                                                                                                             |
| TPM2   | P07951     | Tropomyosin beta chain                                                   | TMSB, Tropomyosin-2, Beta-tropomyosin                 | actin binding protein                                                                                                                        | none                                                                                                                                                                                                                                                                                                                                                                                                                                                             |

**Supplementary Information 2 | Primer sequences.** Primer sequences for qPCR, FISH, and eCLIP-Seq.

**qPCR Primers used in this study**

|                 | Gene                          | Forward Primer (5' to 3') | Reverse Primer (5' to 3') |
|-----------------|-------------------------------|---------------------------|---------------------------|
| RNA Primers     | Major Late Promoter Spliced   | TTCCGCATCGCTGTCTG         | CCGATCCAAGAGTACTGGAAAG    |
|                 | Major Late Promoter Unspliced | GTCCAGGGTTTCCTTGATGAT     |                           |
|                 | Fiber Spliced                 | GAAAGGCGTCTAACCAGTCA      | AAAGGCACAGTTGGAGGAC       |
|                 | Fiber Unspliced               | CATCCGCACCCACTATCTTC      |                           |
|                 | E1A Spliced                   | TGGACCCTCGGGAATGAA        | TCAGGCTCAGTTTCAGACA       |
|                 | E1A Unspliced                 | GGCTTAAGGGTGGGAAAGAA      |                           |
|                 | Penton                        |                           | GGAGCATCGAAGGGAGAAC       |
|                 | Hexon                         | GAAAGGCGTCTAACCAGTCA      | CCCGAGATGTGCATGTAAGA      |
|                 | L4-100K                       |                           | GGTTAGGCTGTCCTTCTTCTC     |
|                 | DBP                           | ATCACCACCGTCAGTGAA        | GTGTTATTGCTGGGCGA         |
|                 | E4-common                     | GACAGGAAACCGTGTGGAATA     | CACAGAGTACACAGTCCTTTCTC   |
|                 | GAPDH                         | TGCACCACCAACTGCTTAGC      | GGCATGGACTGTGGTCATGAG     |
|                 | hnRNP-C                       | TCGAAACGTCAGCGTGTATC      | CTGGGTCAGCTCCTTCTTAATG    |
|                 | RALY                          | CTTCAGGCAAGCAATGTAACC     | CCATGTTGATGTCCAGGGTC      |
|                 | HPRT                          | TGACACTGGCAAAACAATGCA     | GGTCCTTTTCACCAGCAAGCT     |
|                 | Actin                         | GCACCACACCTTCTACAATGAG    | GGTCTCAAACATGATCTGGGTC    |
| Genomic Primers | DBP                           | ATCACCACCGTCAGTGAA        | GTGTTATTGCTGGGCGA         |
|                 | Tubulin                       | CCAGATGCCAAGTGACAAGAC     | GAGTGAGTGACAAGAGAAGCC     |

## FISH probes

### Fiber probes:

| Probe name   | 5' -> 3'              |
|--------------|-----------------------|
| Ad5 Fiber 1  | gaaggtatcttcagacggtc  |
| Ad5 Fiber 2  | tgatcatatggatacacgggg |
| Ad5 Fiber 3  | gaaaaggcacagtggagga   |
| Ad5 Fiber 4  | atgtttgcagggtagcttt   |
| Ad5 Fiber 5  | tactgctatcggtggtggtg  |
| Ad5 Fiber 6  | gggtgaggcagtgatagtaa  |
| Ad5 Fiber 7  | taccagtggcagtagttaga  |
| Ad5 Fiber 8  | tctttcaagtcaatgcccaa  |
| Ad5 Fiber 9  | ttaatagtcacacctggacc  |
| Ad5 Fiber 10 | ctccagtaactttagtttg   |
| Ad5 Fiber 11 | tgcttgtgaatcaaaaccc   |
| Ad5 Fiber 12 | cctgctacattaagttgcat  |
| Ad5 Fiber 13 | aggcgtctgtttgagaatc   |
| Ad5 Fiber 14 | ggttttgagcatcaaacgga  |
| Ad5 Fiber 15 | gtaaaggcctttgtttagt   |
| Ad5 Fiber 16 | tggaattgttgaagctgta   |
| Ad5 Fiber 17 | cttaggttaacctcaagctt  |
| Ad5 Fiber 18 | aaacatcaacccttggcag   |
| Ad5 Fiber 19 | ttaatggctatggctgtagc  |
| Ad5 Fiber 20 | aaattcaagcccatctcctg  |
| Ad5 Fiber 21 | tgtttgggtgcattaggtgaa |
| Ad5 Fiber 22 | accatagccttgtttgaatc  |
| Ad5 Fiber 23 | aaggccagttcctagtttag  |
| Ad5 Fiber 24 | tggcacctgtgctgtcaaaa  |
| Ad5 Fiber 25 | gggtgtggtccacaaagttag |
| Ad5 Fiber 26 | gtctacagttaggagatgga  |
| Ad5 Fiber 27 | ttagcatctttctctgcatt  |
| Ad5 Fiber 28 | gcactccattttctgcaaat  |
| Ad5 Fiber 29 | ggccaggaaggaattgttt   |
| Ad5 Fiber 30 | tctccatttctaaagttcca  |
| Ad5 Fiber 31 | ataggctgtgccttcagtaa  |
| Ad5 Fiber 32 | aggcataaatccaacagcgt  |

### GAPDH Probes:

| Probe name | 5' -> 3'              |
|------------|-----------------------|
| hGAPDH_1   | caaaagaagatgctggctgac |
| hGAPDH_2   | catggtgtctgagcgtatgtg |
| hGAPDH_3   | atacgaccaaatccgttgac  |
| hGAPDH_4   | cagagttaaagcagccctg   |
| hGAPDH_5   | tgatggcaacaatatccact  |
| hGAPDH_6   | ttgaggtcaatgaaggggtc  |
| hGAPDH_7   | ttggaacatgtaaccatgt   |
| hGAPDH_8   | gaatttgccatgggtggaat  |
| hGAPDH_9   | cattgatgacaagcttcccg  |
| hGAPDH_10  | tggaagatggtgatgggatt  |
| hGAPDH_11  | ccacttgattttggagggat  |
| hGAPDH_12  | cttctccatgggtggtgaaga |
| hGAPDH_13  | gcagagatgatgaccctttt  |
| hGAPDH_14  | ttcacacctatgacgaacat  |
| hGAPDH_15  | ggctgtgtcatacttctca   |
| hGAPDH_16  | gaggcattgctgatgatctt  |
| hGAPDH_17  | agttgtcatggatgaccttg  |
| hGAPDH_18  | tcatgagtcctccacgata   |
| hGAPDH_19  | catccacagtcttctgggtg  |
| hGAPDH_20  | agggatgatgttctggagag  |
| hGAPDH_21  | ttcagctcagggatgacctt  |
| hGAPDH_22  | ttggcaggttttctagacg   |
| hGAPDH_23  | caccaccttctgatgtcat   |
| hGAPDH_24  | ctgttgaagtcagaggagac  |
| hGAPDH_25  | gacaaagtggctgtgaggg   |
| hGAPDH_26  | tgtcataccaggaaatgagc  |
| hGAPDH_27  | ctgttgctgtagccaaattc  |
| hGAPDH_28  | cttactccttggaggccatg  |
| hGAPDH_29  | ggctctctcttctcttctgt  |
| hGAPDH_30  | aactgtgaggaggggagatt  |
| hGAPDH_31  | cctcttcaaggggtctacat  |
| hGAPDH_32  | gatggtacatgacaaggtgc  |

**seCLIP-Seq primers**

| Primer name | 5' -> 3'                                                               |
|-------------|------------------------------------------------------------------------|
| 3SR_RNA     | 5' /5Phos/rNrNrNrNrArGrArUrCrGrGrArArGrArGrCrArCrArCrGrUrCrU/3SpC3/ 3' |
| SR_RTv2     | 5' CAGACGTGTGCTCTTCCGA 3'                                              |
| SR_DNA      | 5' /5Phos/NNNNNAGATCGGAAGAGCGTCGTGTAG/3SpC3/ 3'                        |
