# Supplementary material
Source: PubMed Central journal article supplement (PMC7529849)
Supplement: NIHMS1601273-supplement-1601273_SourceData_ED6.pdf [file NIHMS1601273-supplement-1601273_SourceData_ED6.pdf]

Extended Data 6b

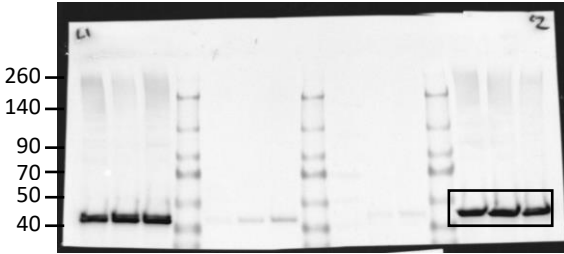

Flag: input  
hnRNP-C2

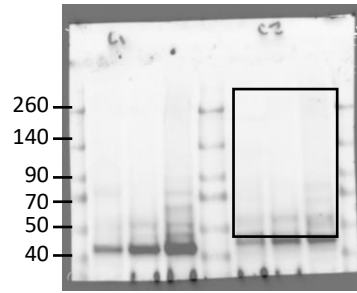

Flag: IP  
hnRNP-C2

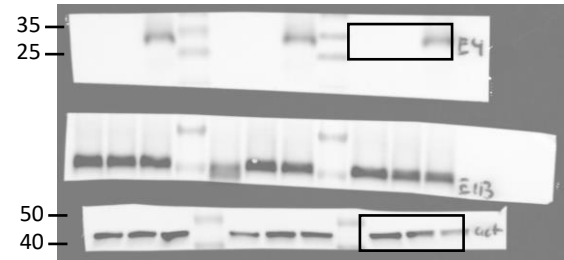

E4orf6: input  
hnRNP-C2

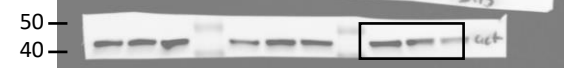

Actin: input  
hnRNP-C2

Extended Data 6d

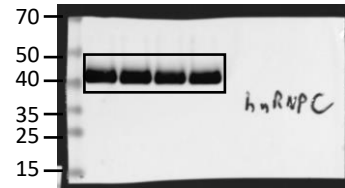

hnRNP-C

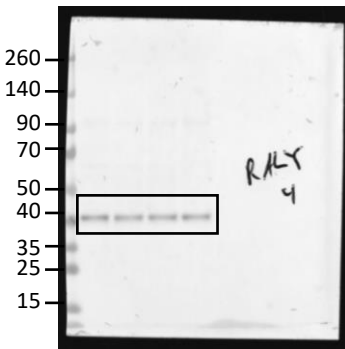

RALY

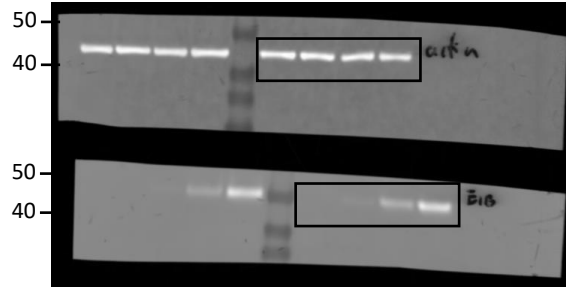

Actin

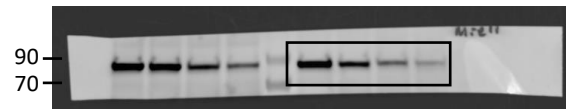

E1B55K



MRE11

Extended Data 6e

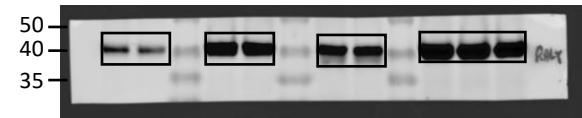

RALY:  
HeLa | U2OS | A549 | HEK293

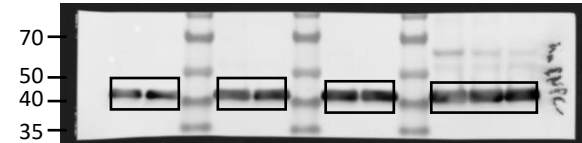

hnRNP-C:  
HeLa | U2OS | A549 | HEK293

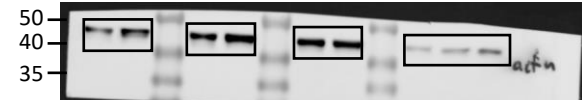

Actin:  
HeLa | U2OS | A549 | HEK293

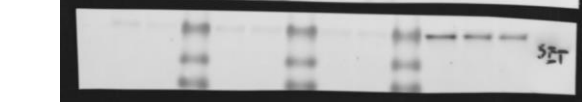

E1B55K:  
HeLa | U2OS | A549 | HEK293

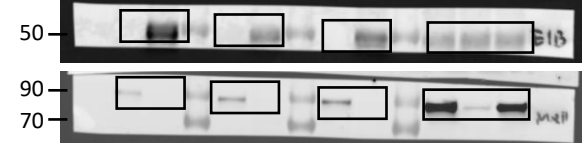

MRE11:  
HeLa | U2OS | A549 | HEK293
