# Supplementary material
Source: PubMed Central journal article supplement (PMC7529849)
Supplement: NIHMS1601273-supplement-1601273_SourceData_ED7.pdf [file NIHMS1601273-supplement-1601273_SourceData_ED7.pdf]

Extended Data 7b

**mock – 30 hpi**

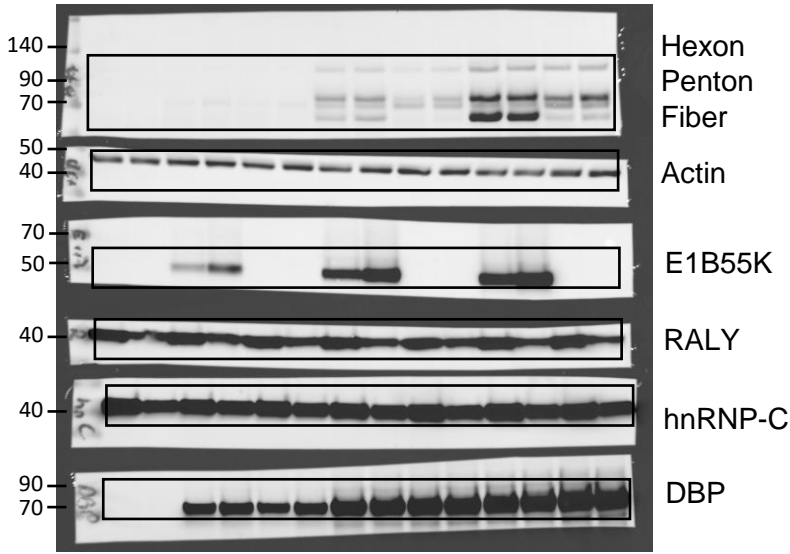

Hexon  
Penton  
Fiber  
Actin  
E1B55K  
RALY  
hnRNP-C  
DBP

**48 hpi**

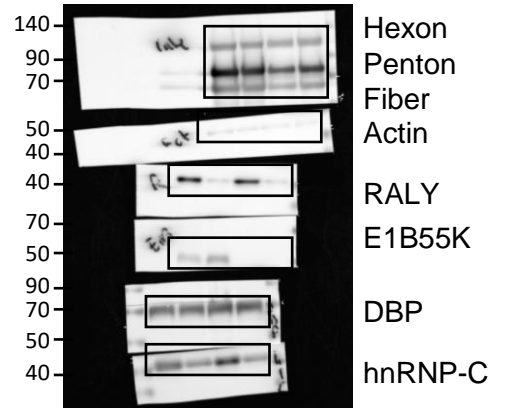

Hexon  
Penton  
Fiber  
Actin  
RALY  
E1B55K  
DBP  
hnRNP-C

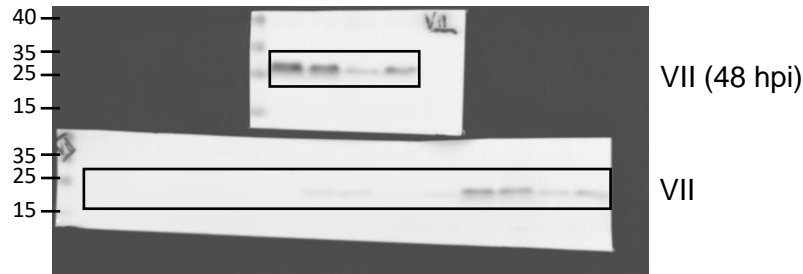

VII (48 hpi)  
VII

Extended Data 7e

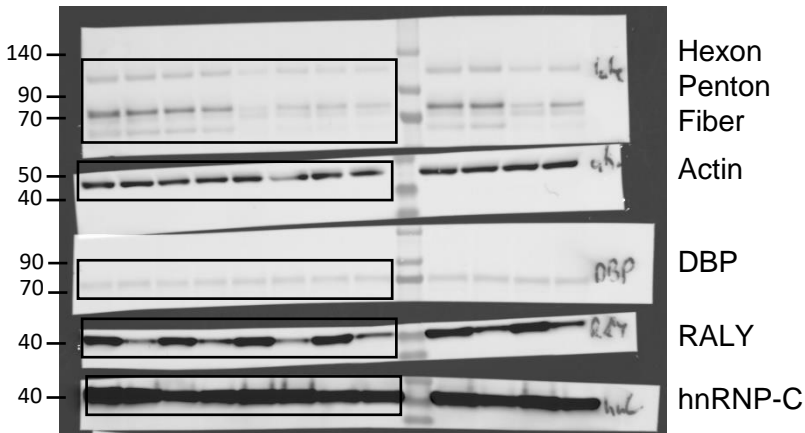

Hexon  
Penton  
Fiber  
Actin  
DBP  
RALY  
hnRNP-C
