# Supplementary material
Source: PubMed Central journal article supplement (PMC7529849)

Extended Data 2a

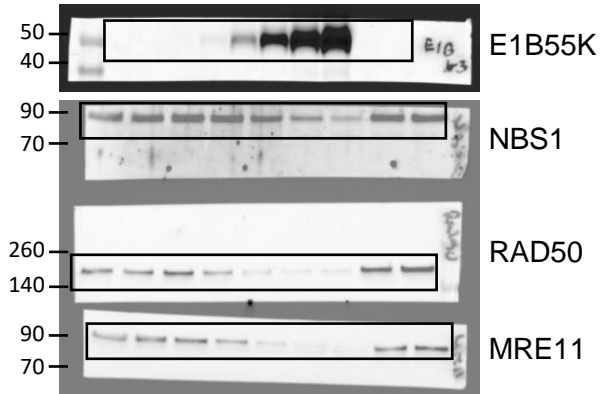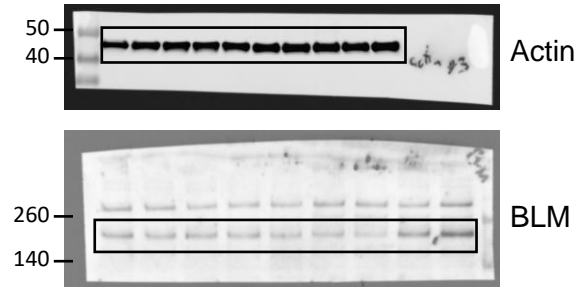

Supplement: NIHMS1601273-supplement-1601273_SourceData_ED2.pdf [file NIHMS1601273-supplement-1601273_SourceData_ED2.pdf]

Extended Data 8b

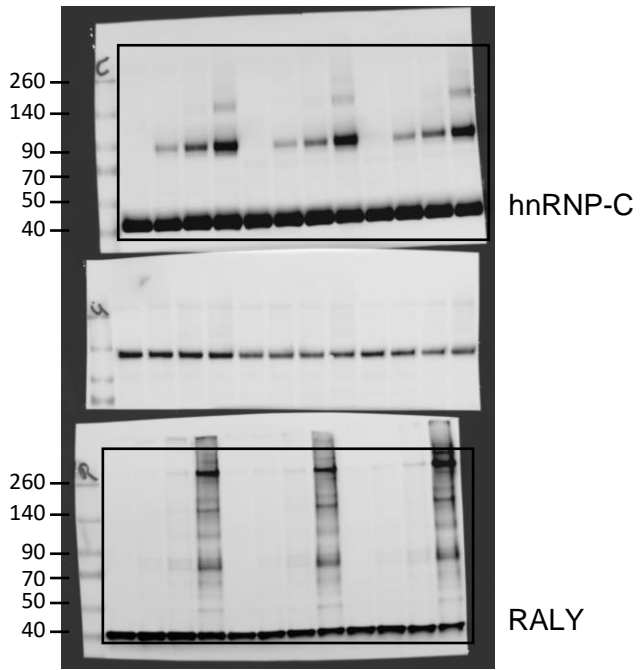

Supplement: NIHMS1601273-supplement-1601273_SourceData_ED8.pdf [file NIHMS1601273-supplement-1601273_SourceData_ED8.pdf]

Extended Data 9a

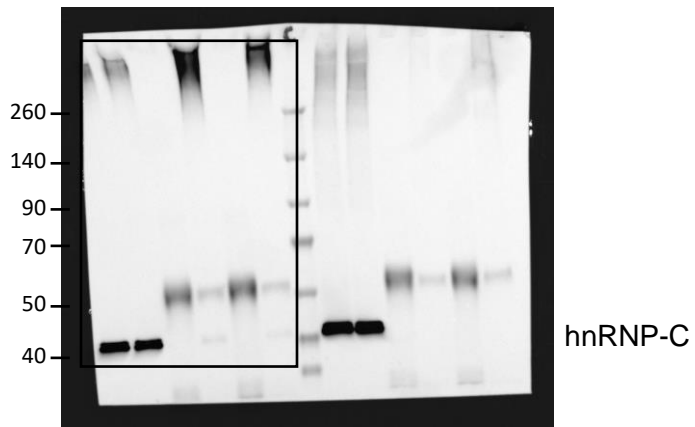

Extended Data 9g

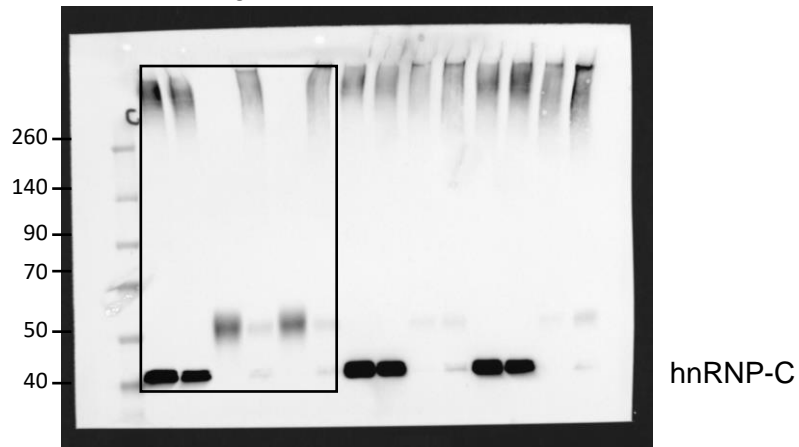

Supplement: NIHMS1601273-supplement-1601273_SourceData_ED9.pdf [file NIHMS1601273-supplement-1601273_SourceData_ED9.pdf]

Fig 1b

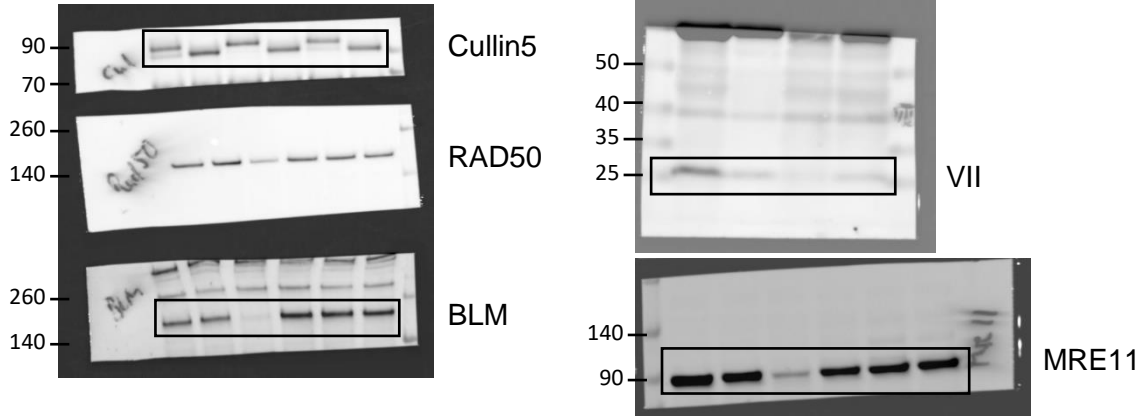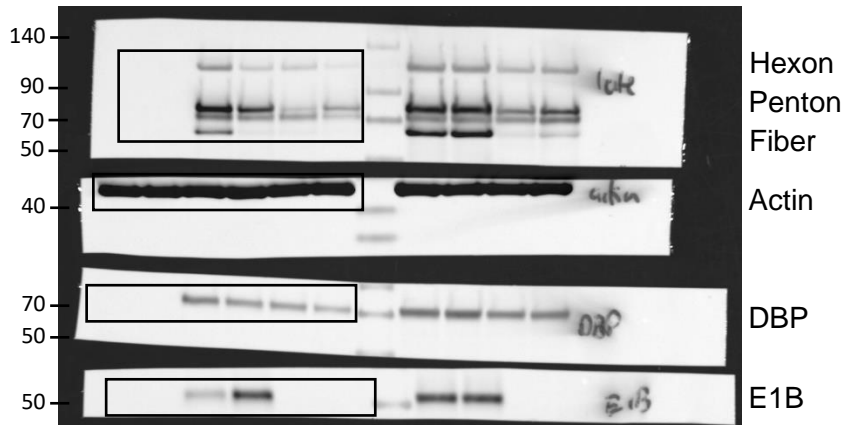

Supplement: NIHMS1601273-supplement-1601273_SourceData_Figure1.pdf [file NIHMS1601273-supplement-1601273_SourceData_Figure1.pdf]

Fig 3b

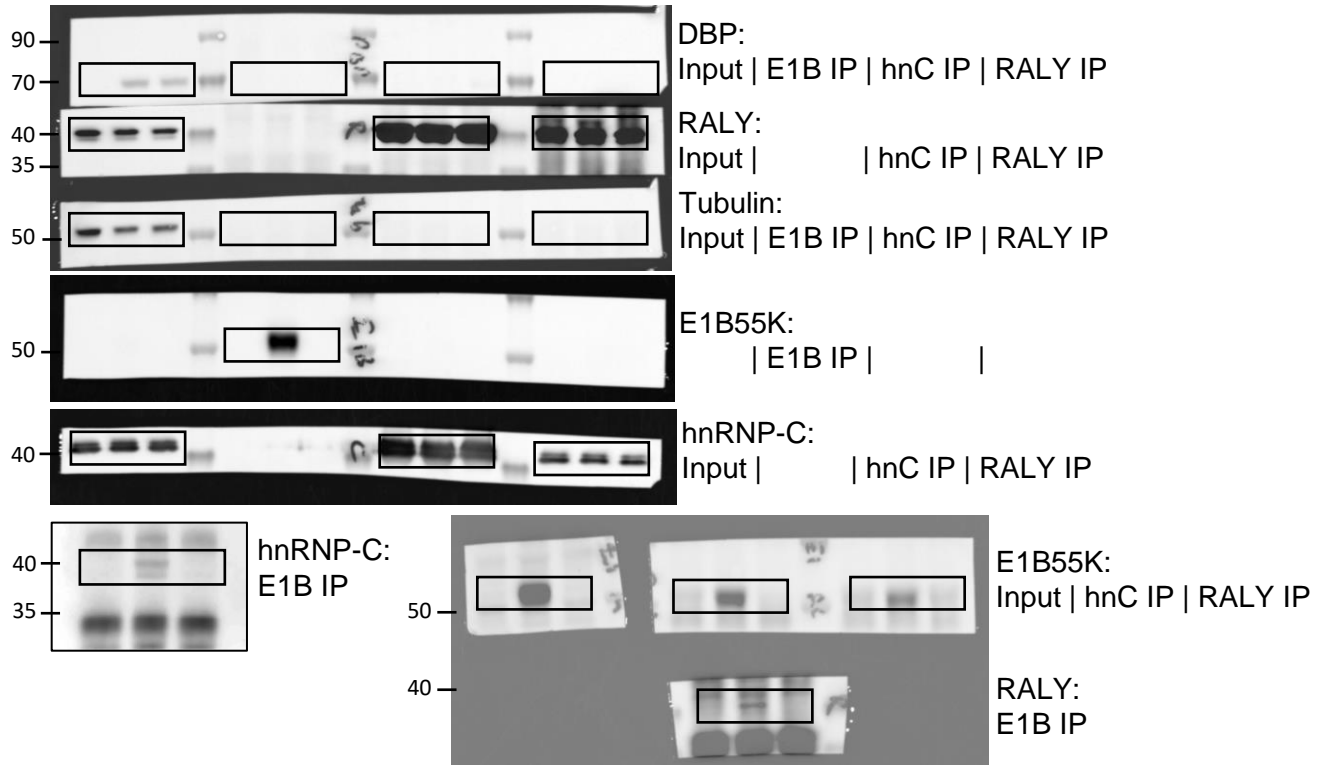

Fig 3c

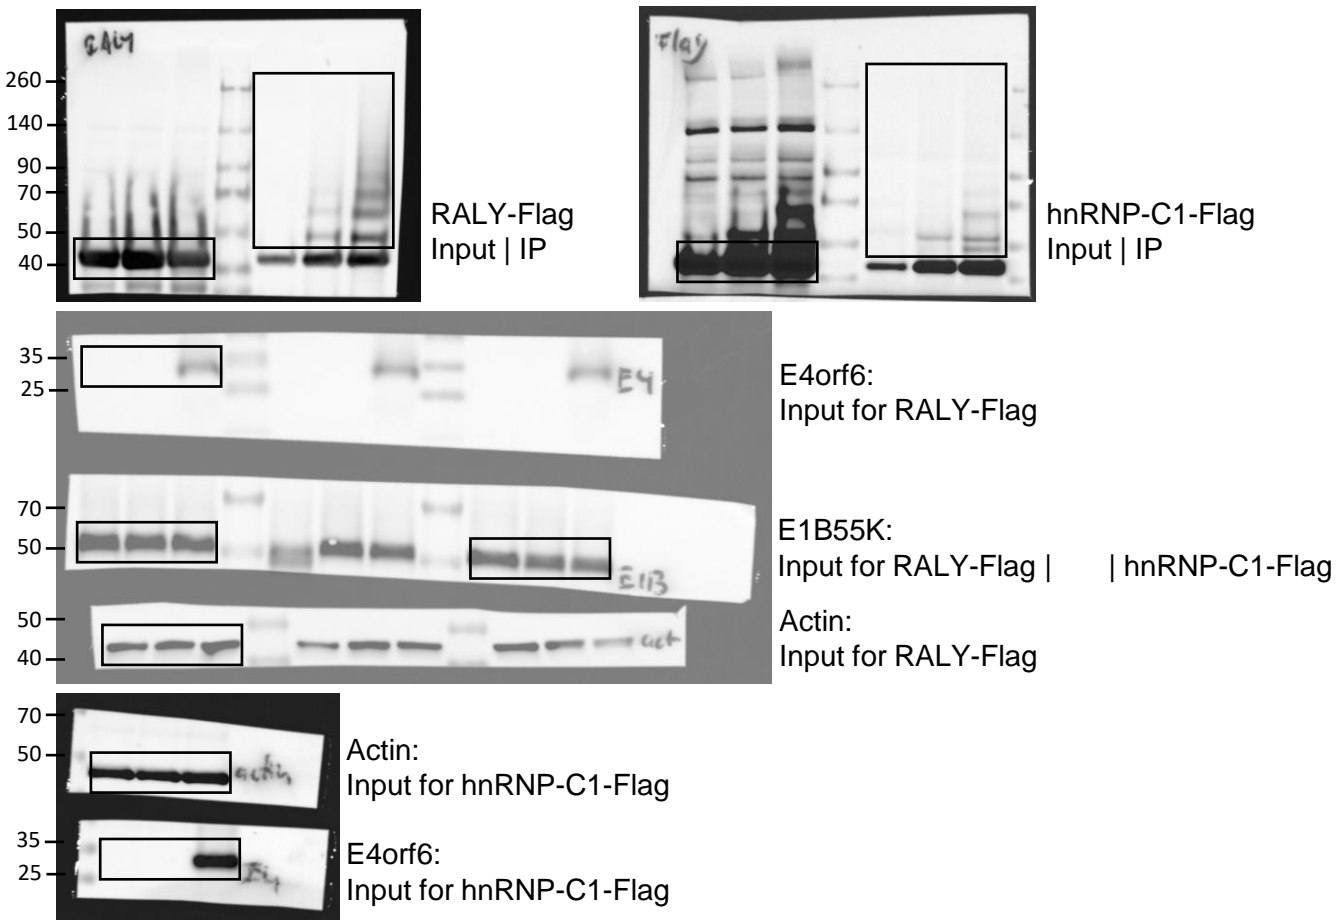

Fig 3d

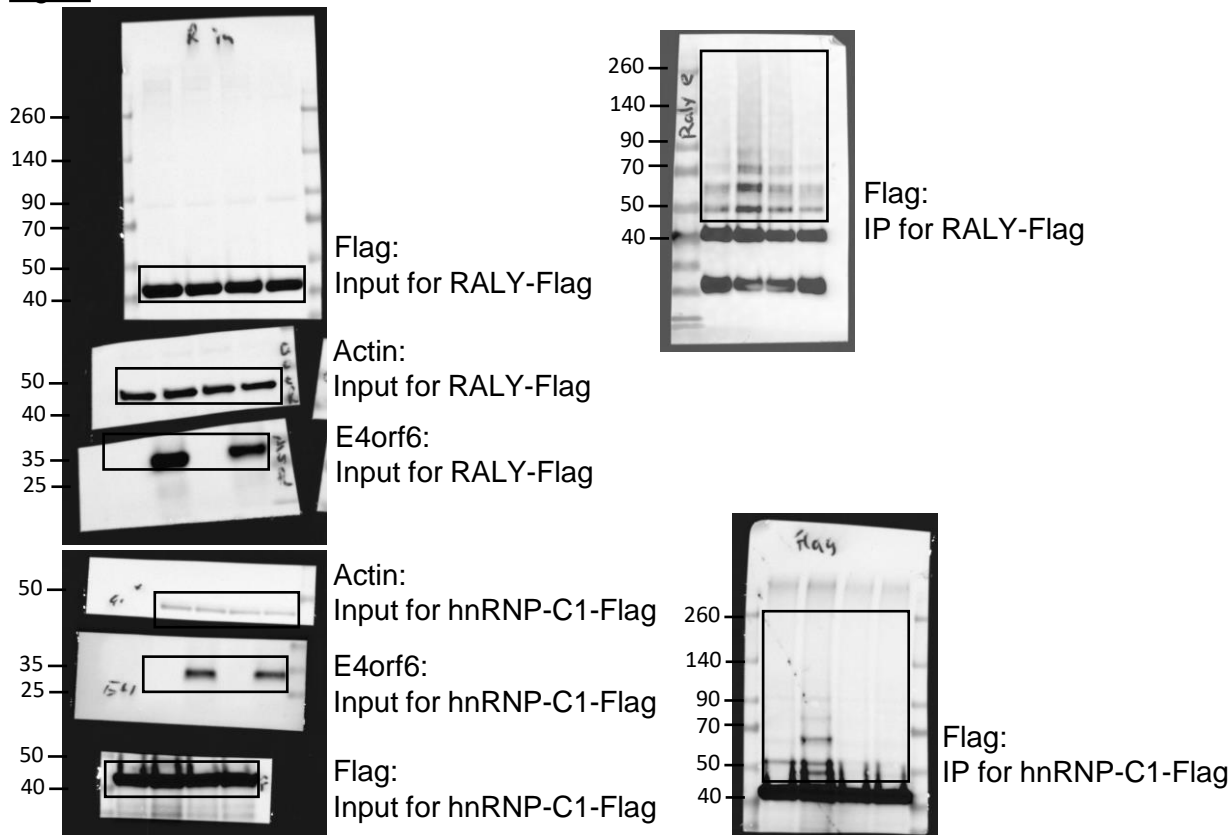

Fig 3e

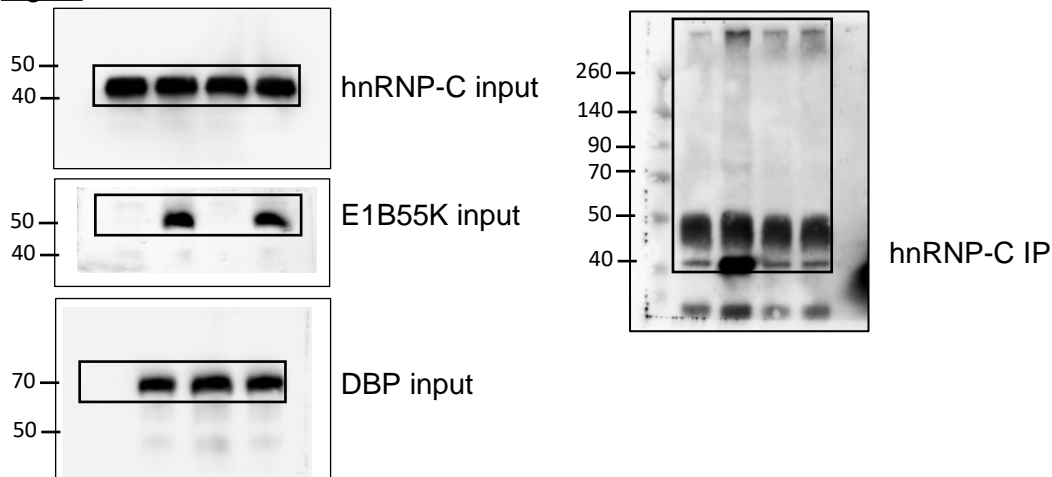

Fig 3f

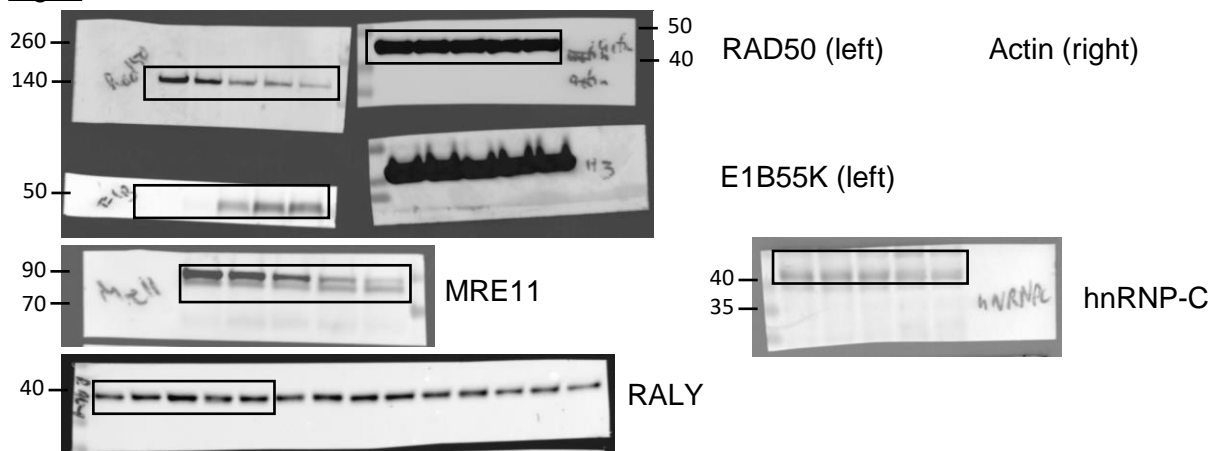

Fig 3g

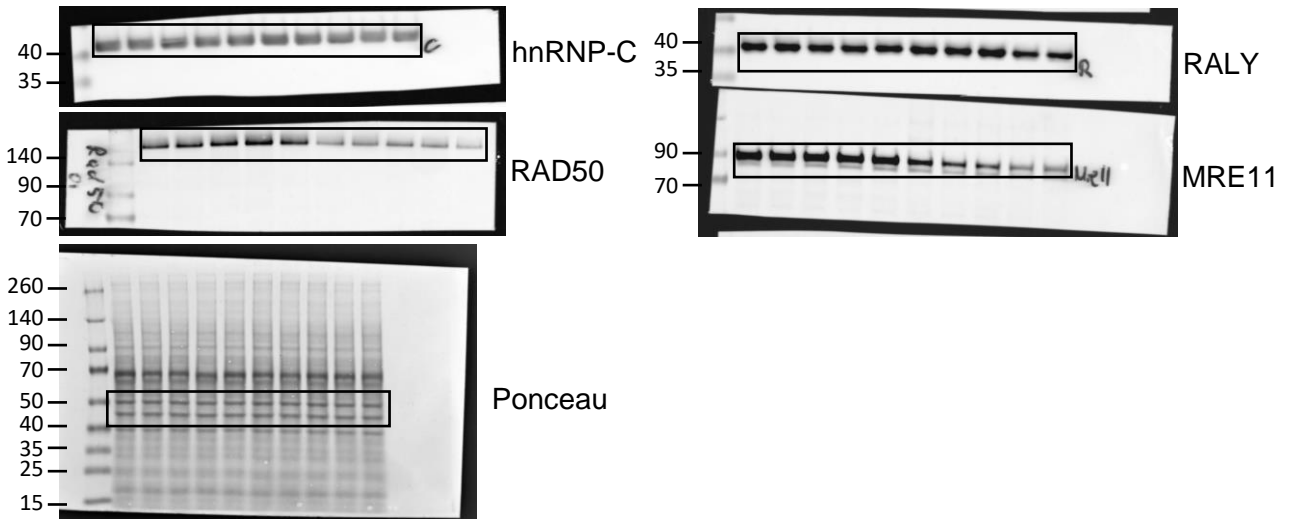

Fig 3h

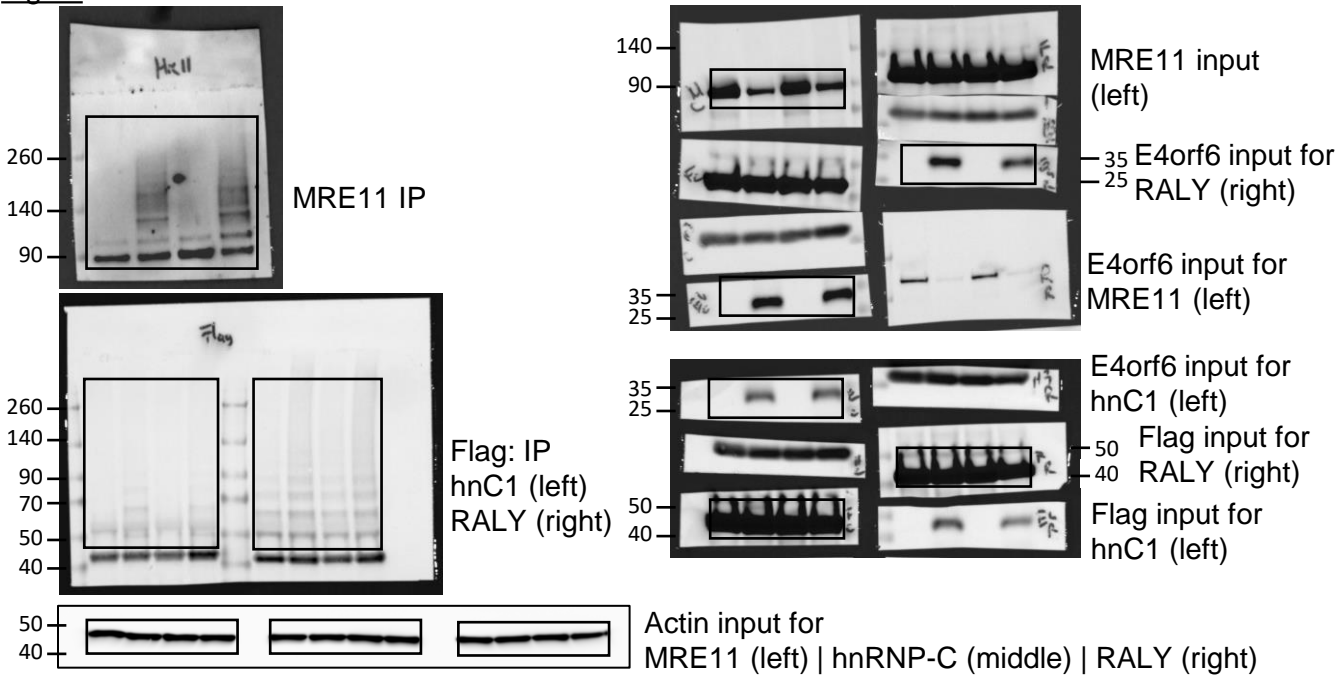

Fig 3i

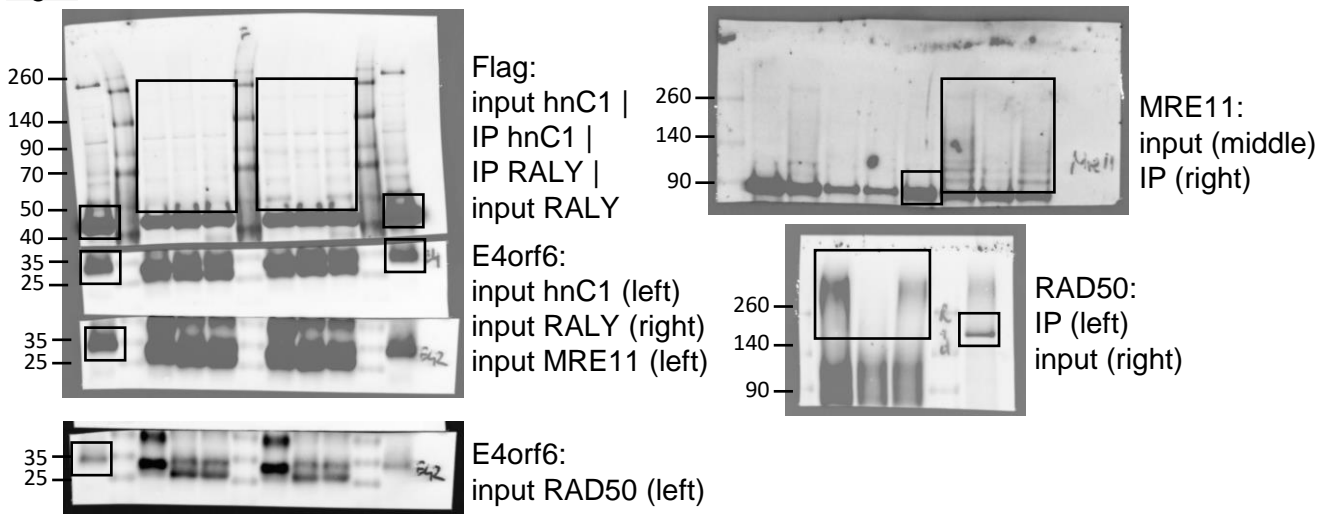

Supplement: NIHMS1601273-supplement-1601273_SourceData_Figure3.pdf [file NIHMS1601273-supplement-1601273_SourceData_Figure3.pdf]

Fig 4a

HeLa

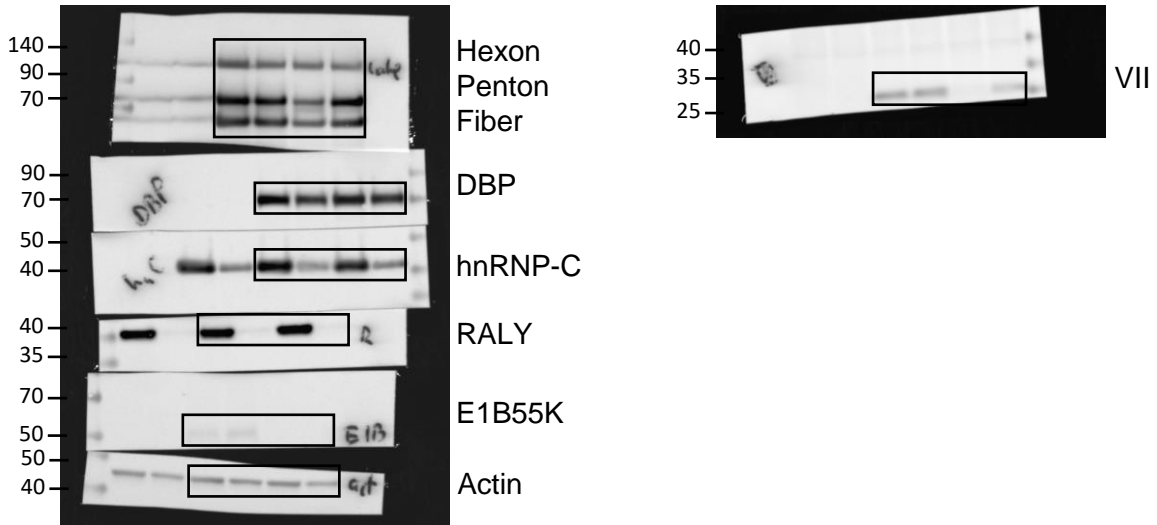

HBEC3-KT

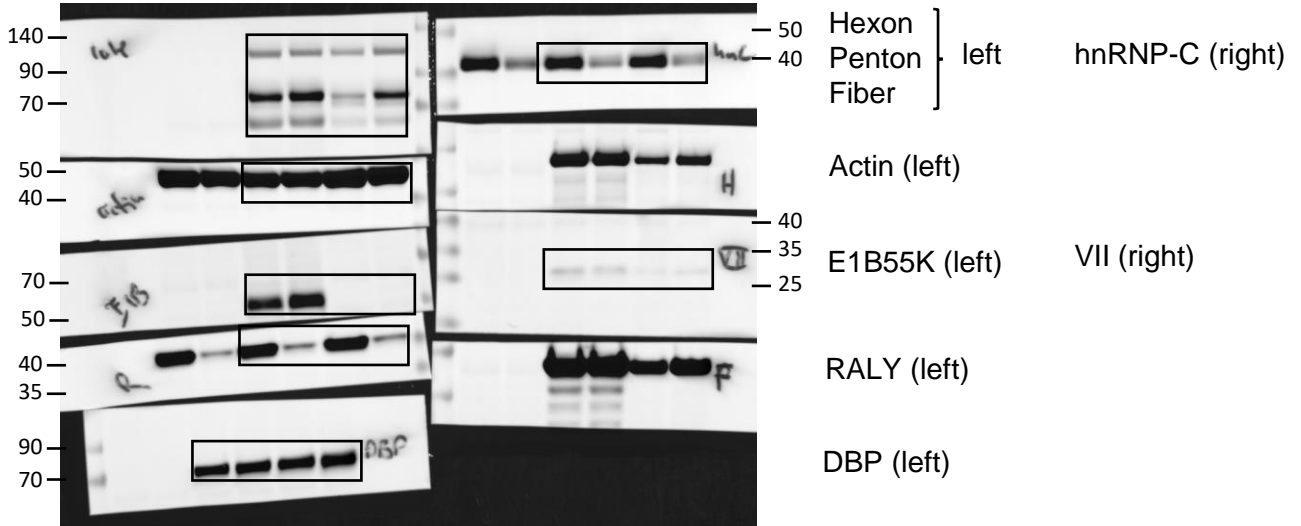

Fig 4i

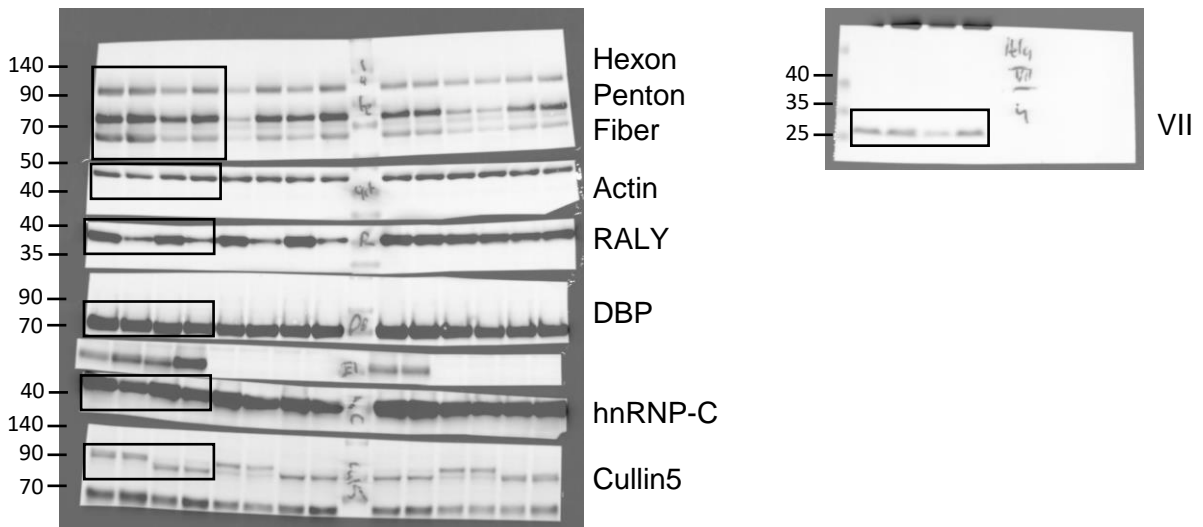

Supplement: NIHMS1601273-supplement-1601273_SourceData_Figure4.pdf [file NIHMS1601273-supplement-1601273_SourceData_Figure4.pdf]
